# Supplementary material
Source: Springer Nature journal article supplement (https://www.springermedizin.de/resource/supplementary/12943_2012_1091_MOESM2_ESM.pdf/9552326)
Supplement: MOESM2 [file 9552326]

**Supplementary Table 2.** Top-ranked ucRNAs differentially expressed between high ( $\geq 7$ ) and low ( $\leq 6$ ) Gleason sum score

| ucRNA    | Fold Change* | FDR (%) | P value  | Type <sup>‡</sup> , host, host strand | Overlap with mRNA | Antisense to mRNA |
|----------|--------------|---------|----------|---------------------------------------|-------------------|-------------------|
| uc.454+A | 1.5          | 4.8     | 1.56E-03 | e, SLC23A1 intronic/exonic, antisense | Yes               |                   |
| uc.315+A | 1.27         | 8.4     | 2.83E-03 | n, no gene                            | No                |                   |
| uc.21+A  | 1.26         | 6       | 1.04E-03 | n, FLJ14442 intronic, antisense       | Yes               |                   |
| uc.262+A | 1.2          | 8.4     | 4.96E-03 | n, no gene                            | No                |                   |
| uc.465+  | 0.8          | 9.1     | 2.75E-03 | p, POLA intronic, sense               | Yes               |                   |
| uc.263+  | 0.8          | 3.5     | 1.52E-03 | e, HNRPK exonic/intronic, antisense   | Yes               |                   |
| uc.182+  | 0.79         | 2.3     | 4.40E-04 | n, RANBP17 intronic, sense            | Yes               |                   |
| uc.282+A | 0.78         | 5.3     | 1.17E-03 | e, GRIN1 exonic/intronic, sense       | Yes               | Yes               |
| uc.306+  | 0.78         | 2.3     | 2.75E-04 | p, BTRC intronic, sense               | Yes               |                   |
| uc.462+  | 0.78         | 3.5     | 1.35E-04 | p, POLA intronic, sense               | Yes               |                   |
| uc.215+  | 0.76         | 3.7     | 3.09E-03 | n, GLI3 intronic, antisense           | Yes               | Yes               |
| uc.172+A | 0.76         | 4.8     | 2.88E-03 | n, AK130941 intronic, antisense       | Yes               |                   |
| uc.448+  | 0.76         | 2.3     | 8.07E-04 | n, EST intronic, sense                | Yes               |                   |
| uc.275+  | 0.74         | 0       | 3.07E-04 | n, PBX3 intronic, sense               | Yes               |                   |
| uc.43+A  | 0.73         | 3.1     | 3.07E-03 | n, AKT3 intronic, antisense           | Yes               |                   |
| uc.282+A | 0.72         | 1.6     | 2.12E-04 | e, GRIN1 exonic/ intronic, sense      | Yes               | Yes               |
| uc.483+A | 0.72         | 2.3     | 1.51E-03 | p, TBC1D5 intronic, antisense         | Yes               |                   |
| uc.20+A  | 0.71         | 1.6     | 6.06E-04 | p, EST intronic, sense/antisense      | Yes               |                   |
| uc.33+A  | 0.71         | 0       | 1.81E-04 | e, PTBP2, sense                       | Yes               | Yes               |
| uc.339+  | 0.71         | 2       | 1.05E-03 | p, no gene                            | No                |                   |
| uc.348+  | 0.7          | 2.3     | 1.45E-03 | n, DACH intronic, antisense           | Yes               | Yes               |
| uc.117+A | 0.69         | 1.6     | 1.52E-03 | n, no gene                            | No                |                   |
| uc.346+  | 0.68         | 0       | 6.92E-06 | p, EST, sense                         | No                |                   |
| uc.204+  | 0.68         | 1.6     | 4.31E-03 | n, no gene                            | No                |                   |
| uc.468+A | 0.67         | 0       | 4.70E-04 | p, no gene                            | No                |                   |
| uc.145+A | 0.67         | 1.6     | 3.65E-03 | n, no gene                            | No                |                   |
| uc.167+  | 0.64         | 0       | 3.40E-03 | n, EST intronic, antisense            | No                |                   |
| uc.269+A | 0.64         | 0       | 1.52E-03 | n, KIAA1608, antisense                | Yes               |                   |
| uc.296+A | 0.61         | 0       | 3.41E-04 | n, no gene                            | No                |                   |

\* Fold change, reference is low Gleason sum score.

‡ Type is based on the original annotation of UCRs (<http://users.soe.ucsc.edu/~jill/ultra.html>) with n = nonexonic, e = exonic, and p = possibly exonic.
